# Supplementary material for: Local and global aromaticity under rotation: analysis of two- and three-dimensional representative carbon nanostructures
Source: Royal Society of Chemistry journal article supplement (doi:10.1039/d3cp00569k), 2023-01-01
Supplement: d3cp00569k1.pdf [file d3cp00569k1.pdf]

# SUPPORTING INFORMATION

## Local and Global Aromaticity under Rotation. Analysis of Two- and Three-Dimensional Representative Carbon Nanostructures

Rafael Lingas,<sup>a</sup> Nickolas D. Charistos,<sup>a,\*</sup> Alvaro Muñoz-Castro<sup>b,\*</sup>

<sup>a</sup> Aristotle University of Thessaloniki, Department of Chemistry, Laboratory of Quantum and Computational Chemistry, Thessaloniki, Greece, 54 124 \*E-mail: nicharis@chem.auth.gr

<sup>b</sup>Facultad de Ingeniería, Arquitectura y Diseño, Universidad San Sebastián, Bellavista 7, Santiago, 8420524, Chile \*E-mail: alvaro.munozc@uss.cl

| Contents                                                                                                                                                                                                                                                                                                                                                                                            | Pages |
|-----------------------------------------------------------------------------------------------------------------------------------------------------------------------------------------------------------------------------------------------------------------------------------------------------------------------------------------------------------------------------------------------------|-------|
| Figures S1-S9                                                                                                                                                                                                                                                                                                                                                                                       | S1-S9 |
| Total and $\pi$ , $\sigma$ +core contributions to the z component of the induced magnetic field, $B_z^{ind}$ , [8]CPP <sup>0/2+</sup> , [10]CPP <sup>0/2+</sup> and C <sub>60</sub> <sup>0/6-/12-</sup> at tilt angles of 0°, 18°, 36°, 54°, 72° and 90°.                                                                                                                                           |       |
| Table S1                                                                                                                                                                                                                                                                                                                                                                                            | S10   |
| Central Nucleus-Independent Chemical Shift tensor for the studied species, which remain under rotation, as given by their principal-axis-system (PAS) for the shielding tensor ( $\sigma$ ), denoting the average, the NICS(0) value ( $NICS(0) = -1/3*(\sigma_{11} + \sigma_{22} + \sigma_{33})$ ) and the anisotropic term ( $NICS_{aniso} = -(\sigma_{33} - 1/2*(\sigma_{11} + \sigma_{22}))$ ). |       |

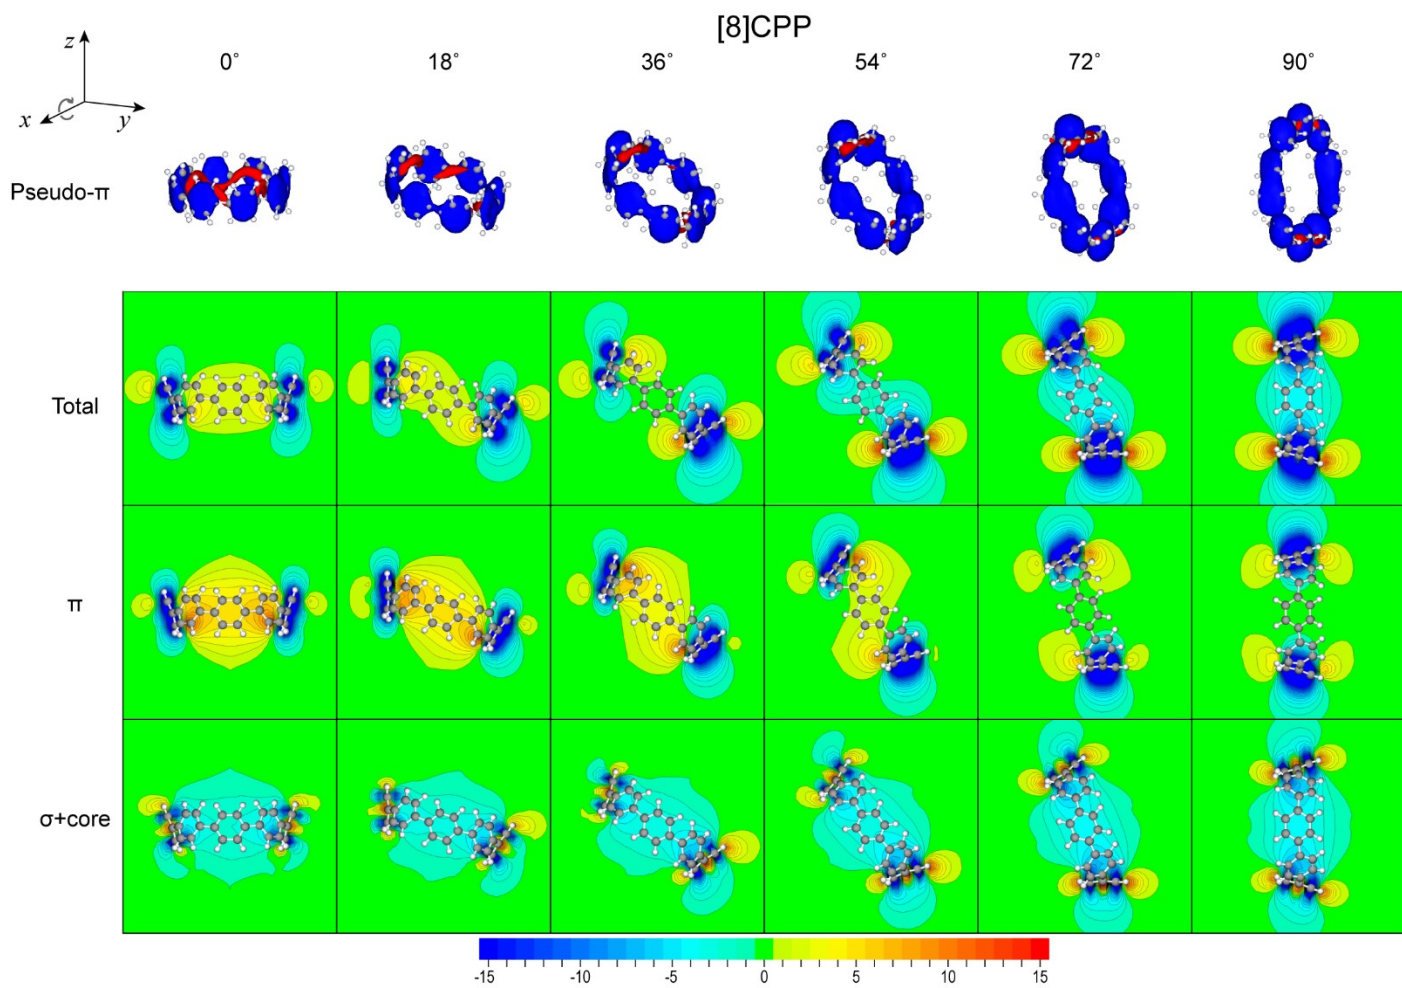

**Figure S1.** Contour maps of total and  $\pi$ ,  $\sigma$ +core contributions to the z component of the induced magnetic field,  $B_z^{ind}$ , and 3D isosurfaces (5ppm) of pseudo- $\pi$  contributions, of [8]CPP at tilt angles of 0°, 18°, 36°, 54°, 72° and 90°.

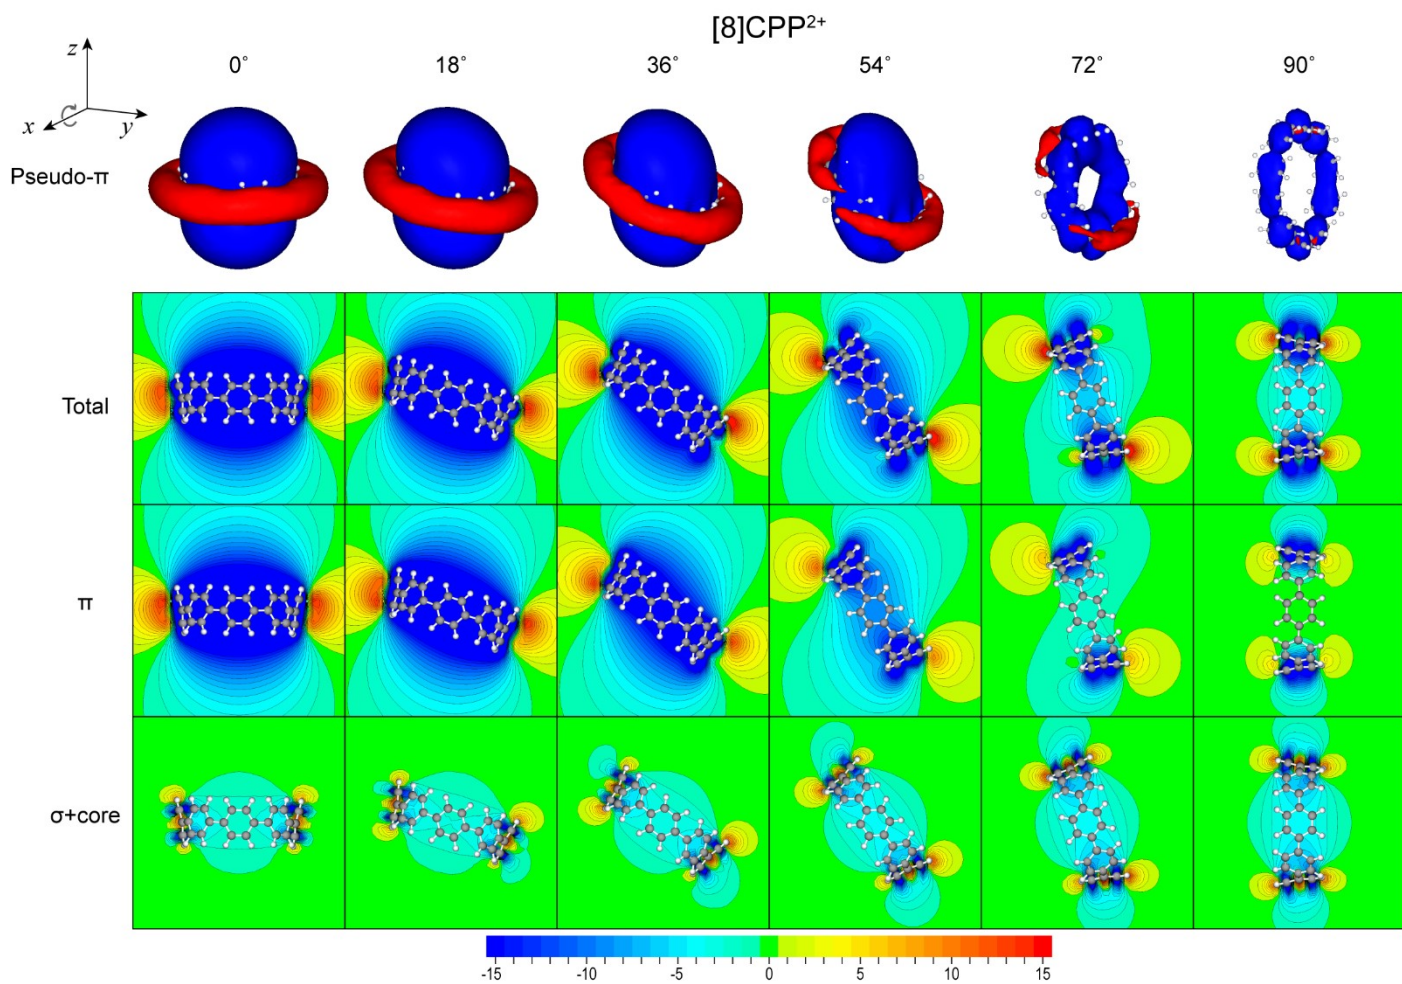

**Figure S2.** Contour maps of total and  $\pi$ ,  $\sigma$ +core contributions to the z component of the induced magnetic field,  $B_z^{ind}$ , and 3D isosurfaces (5ppm) of pseudo- $\pi$  contributions, of [8]CPP<sup>2+</sup> at tilt angles of 0°, 18°, 36°, 54°, 72° and 90°.

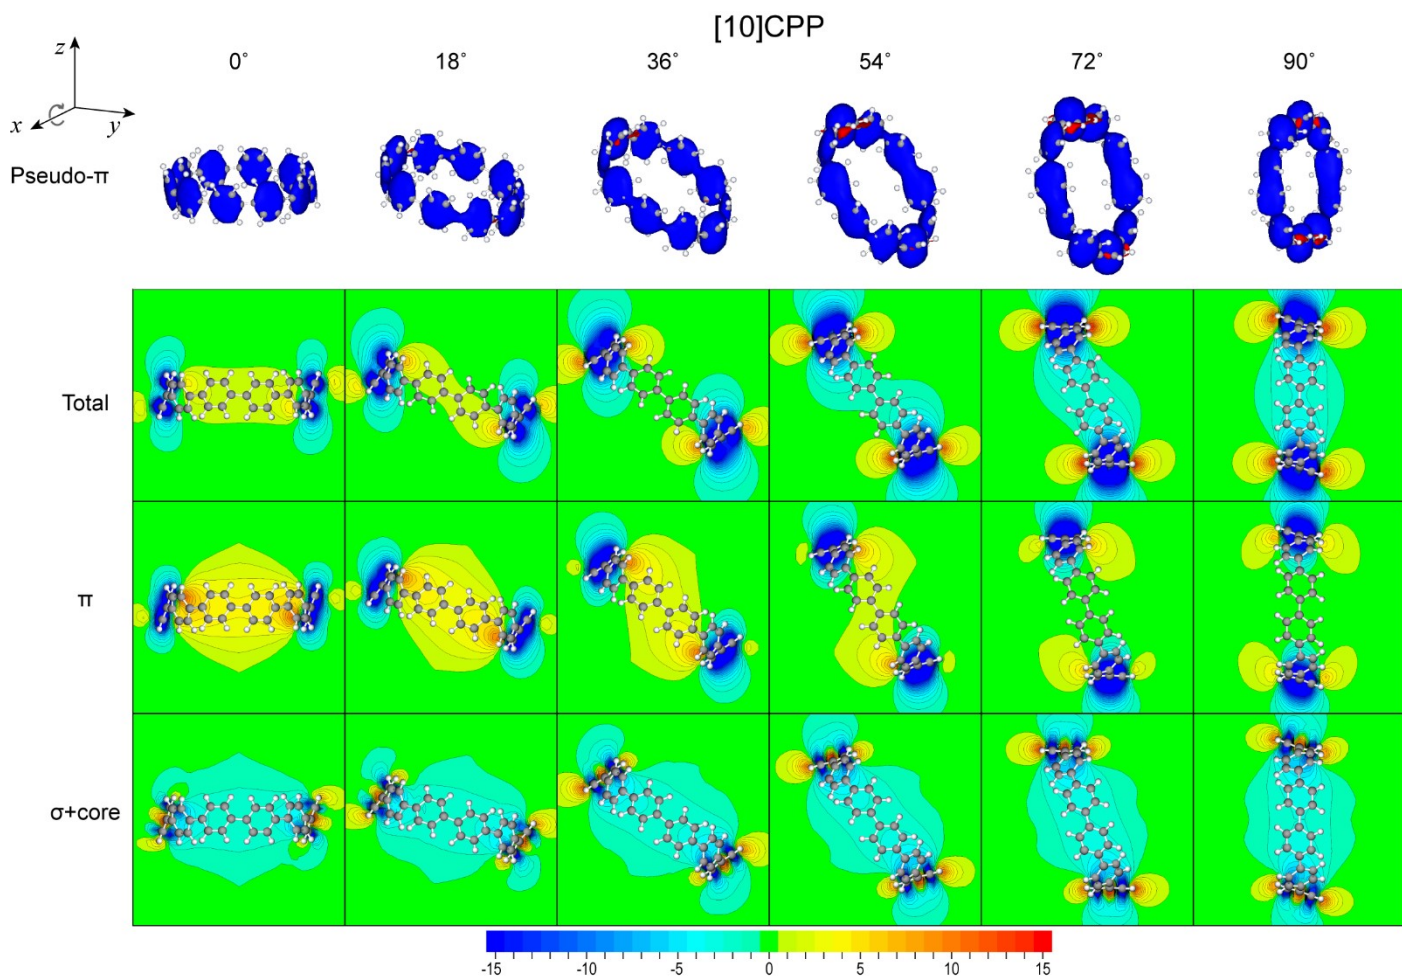

**Figure S3.** Contour maps of total and  $\pi$ ,  $\sigma$ +core contributions to the z component of the induced magnetic field,  $B_z^{ind}$ , and 3D isosurfaces (5ppm) of pseudo- $\pi$  contributions, of [10]CPP at tilt angles of  $0^\circ$ ,  $18^\circ$ ,  $36^\circ$ ,  $54^\circ$ ,  $72^\circ$  and  $90^\circ$ .

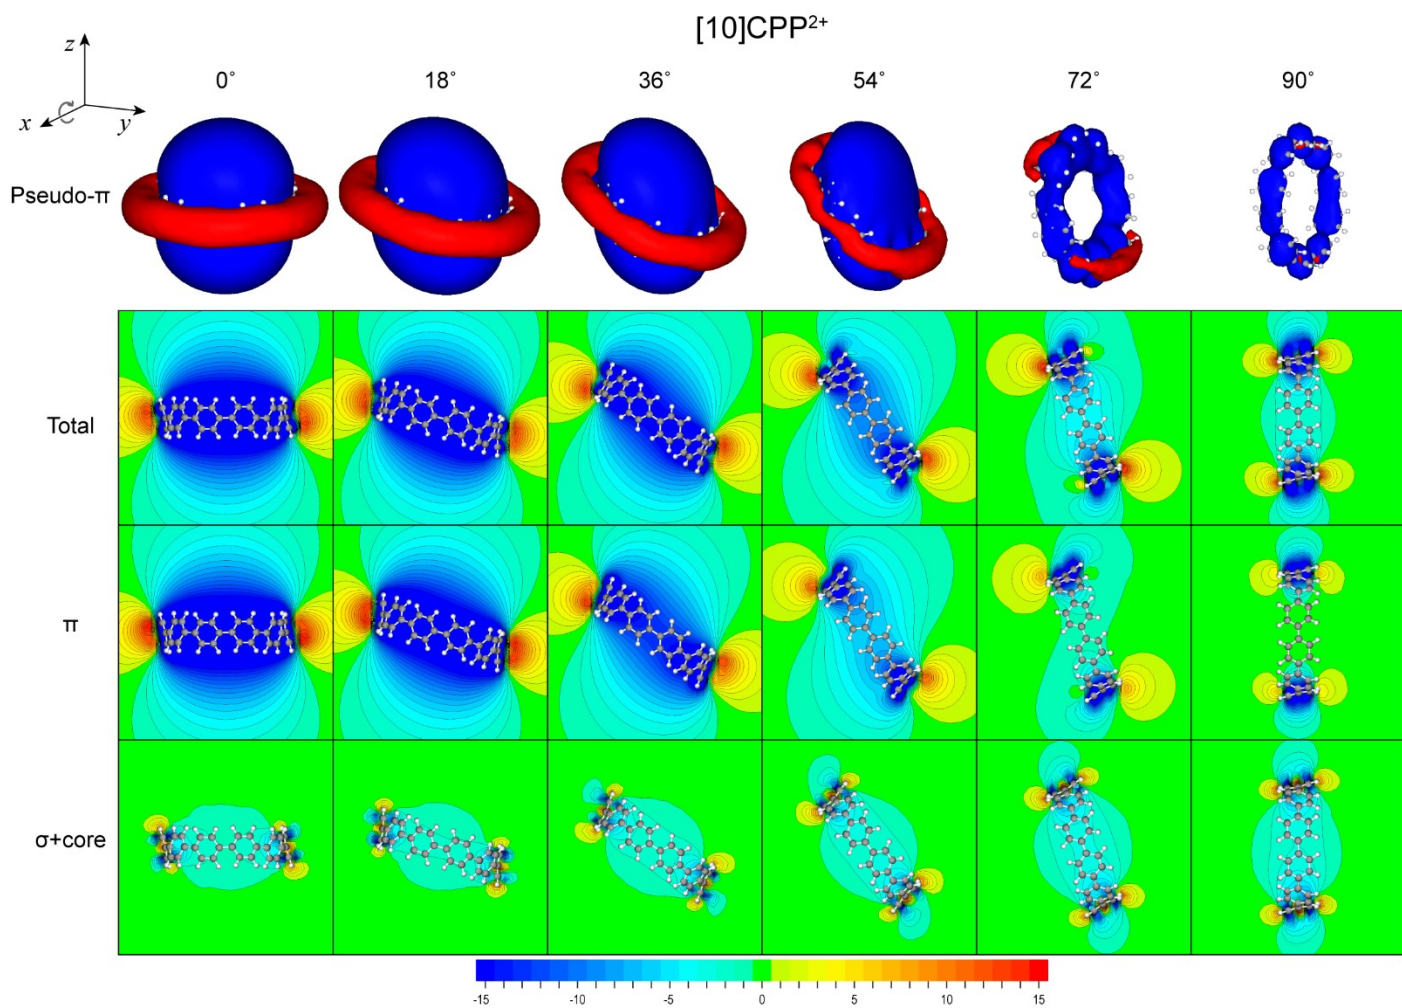

**Figure S4.** Contour maps of total and  $\pi$ ,  $\sigma$ +core contributions to the z component of the induced magnetic field,  $B_z^{ind}$ , and 3D isosurfaces (5ppm) of pseudo- $\pi$  contributions, of [10]CPP<sup>2+</sup> at tilt angles of 0°, 18°, 36°, 54°, 72° and 90°.

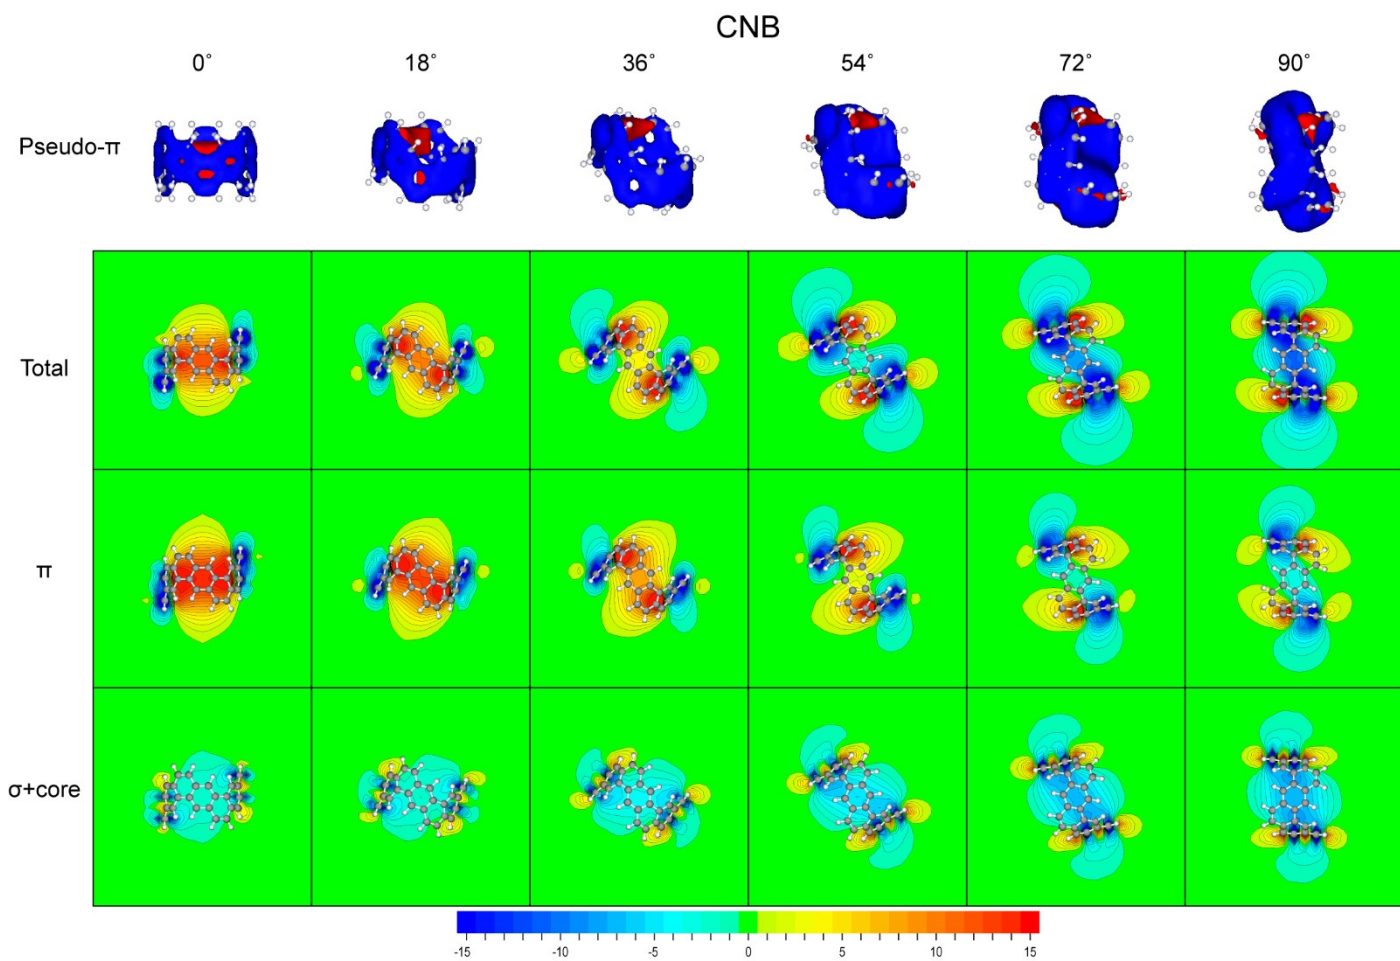

**Figure S5.** Contour maps of total and  $\pi$ ,  $\sigma$ +core contributions to the z component of the induced magnetic field,  $B_z^{ind}$ , and 3D isosurfaces (5ppm) of pseudo- $\pi$  contributions, of CNB at tilt angles of 0°, 18°, 36°, 54°, 72° and 90°.

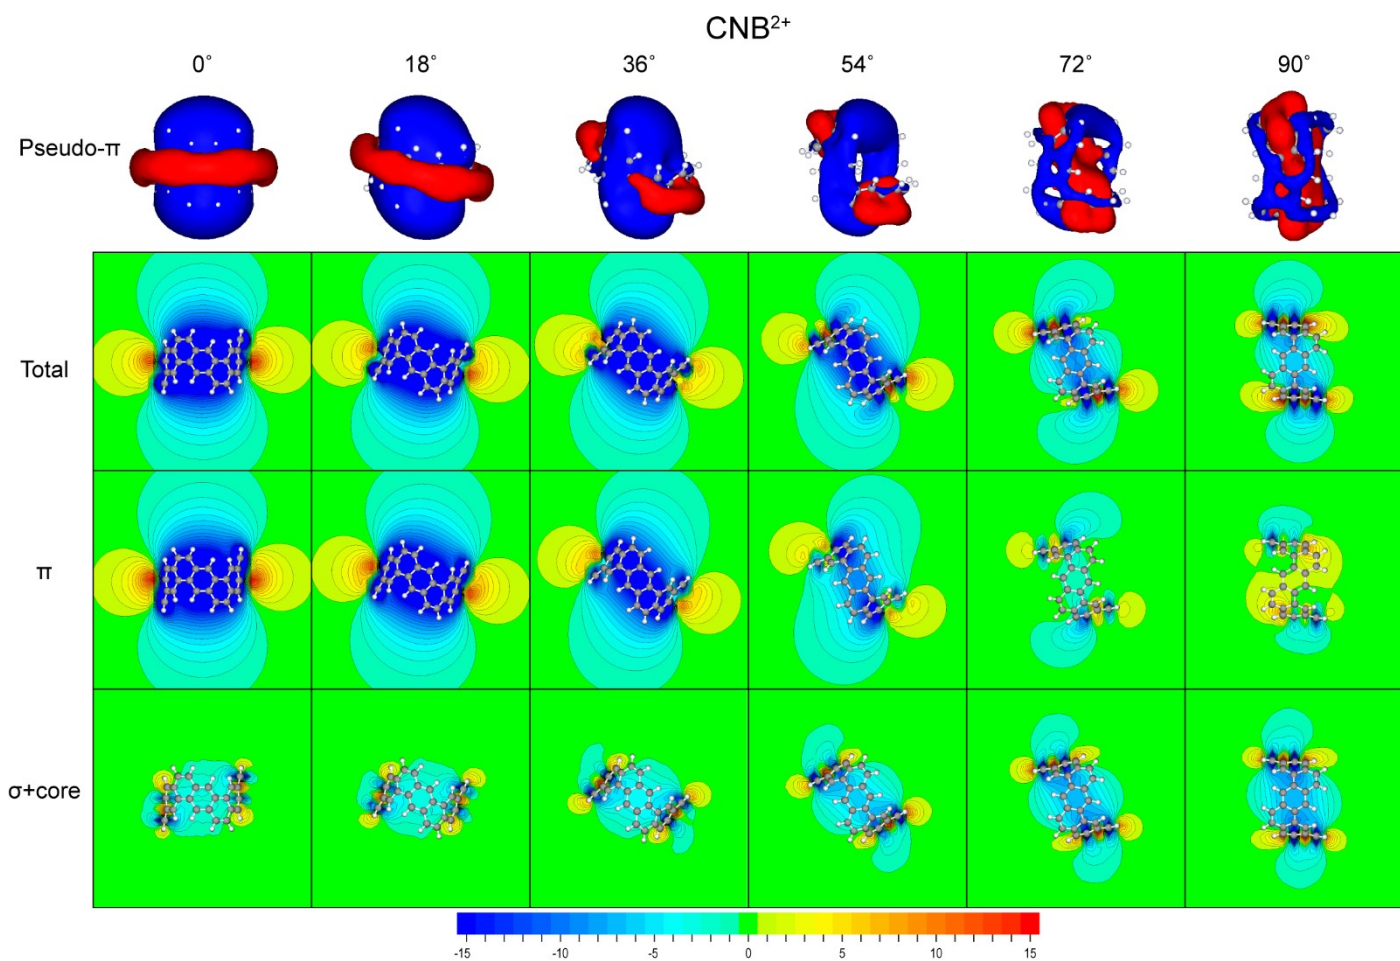

**Figure S6.** Contour maps of total and  $\pi$ ,  $\sigma$ +core contributions to the z component of the induced magnetic field,  $B_z^{ind}$ , and 3D isosurfaces (5ppm) of pseudo- $\pi$  contributions, of CNB<sup>2+</sup> at tilt angles of 0°, 18°, 36°, 54°, 72° and 90°.

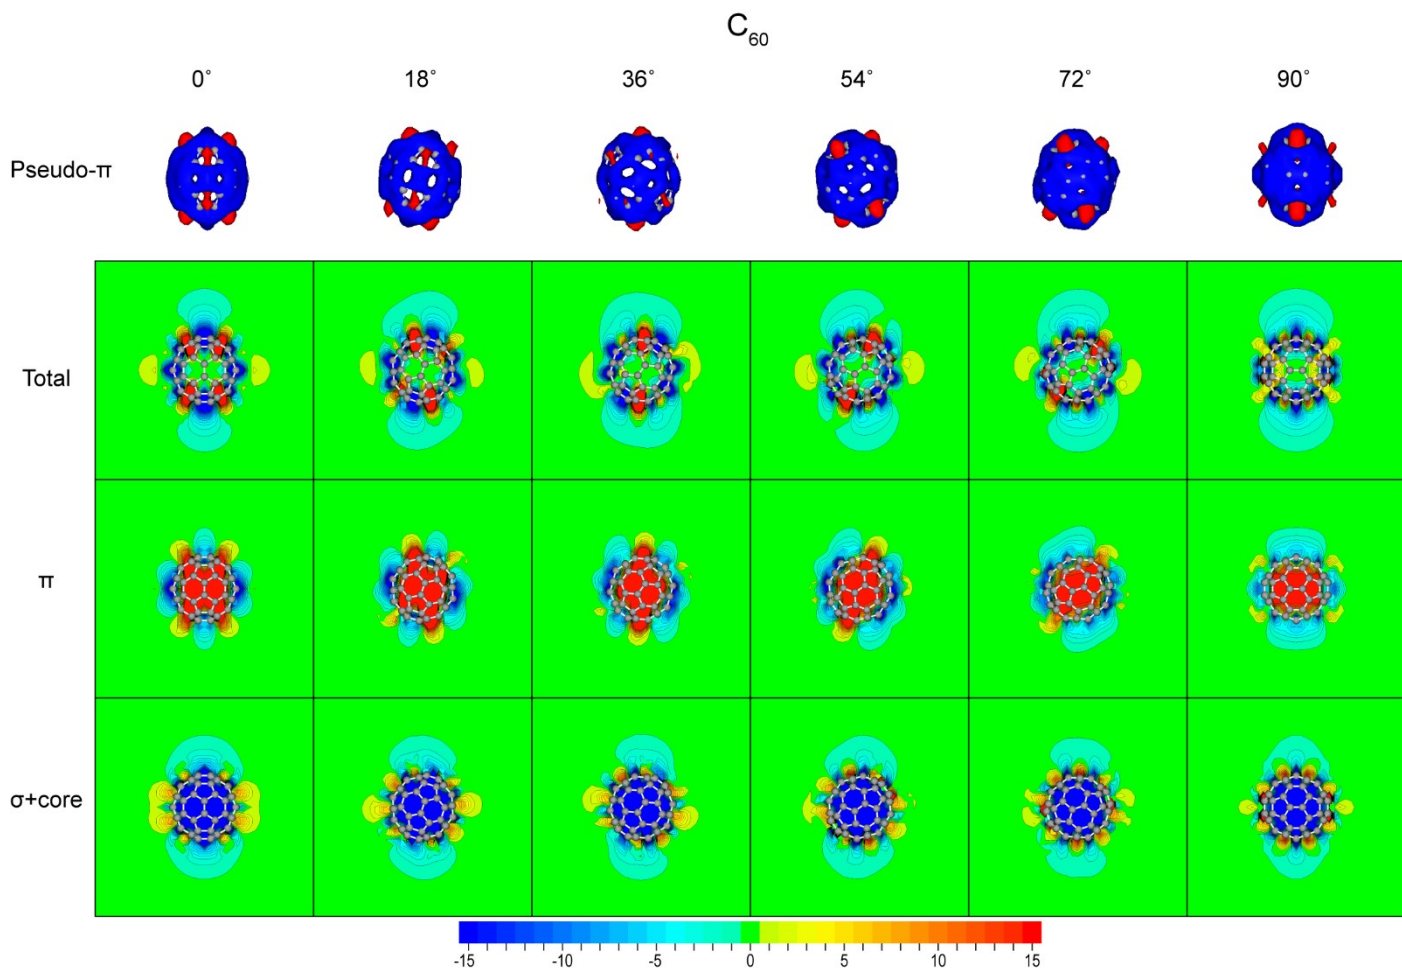

**Figure S7.** Contour maps of total and  $\pi$ ,  $\sigma$ +core contributions to the z component of the induced magnetic field,  $B_z^{ind}$ , and 3D isosurfaces (5ppm) of pseudo- $\pi$  contributions, of  $C_{60}$  at tilt angles of 0°, 18°, 36°, 54°, 72° and 90°.



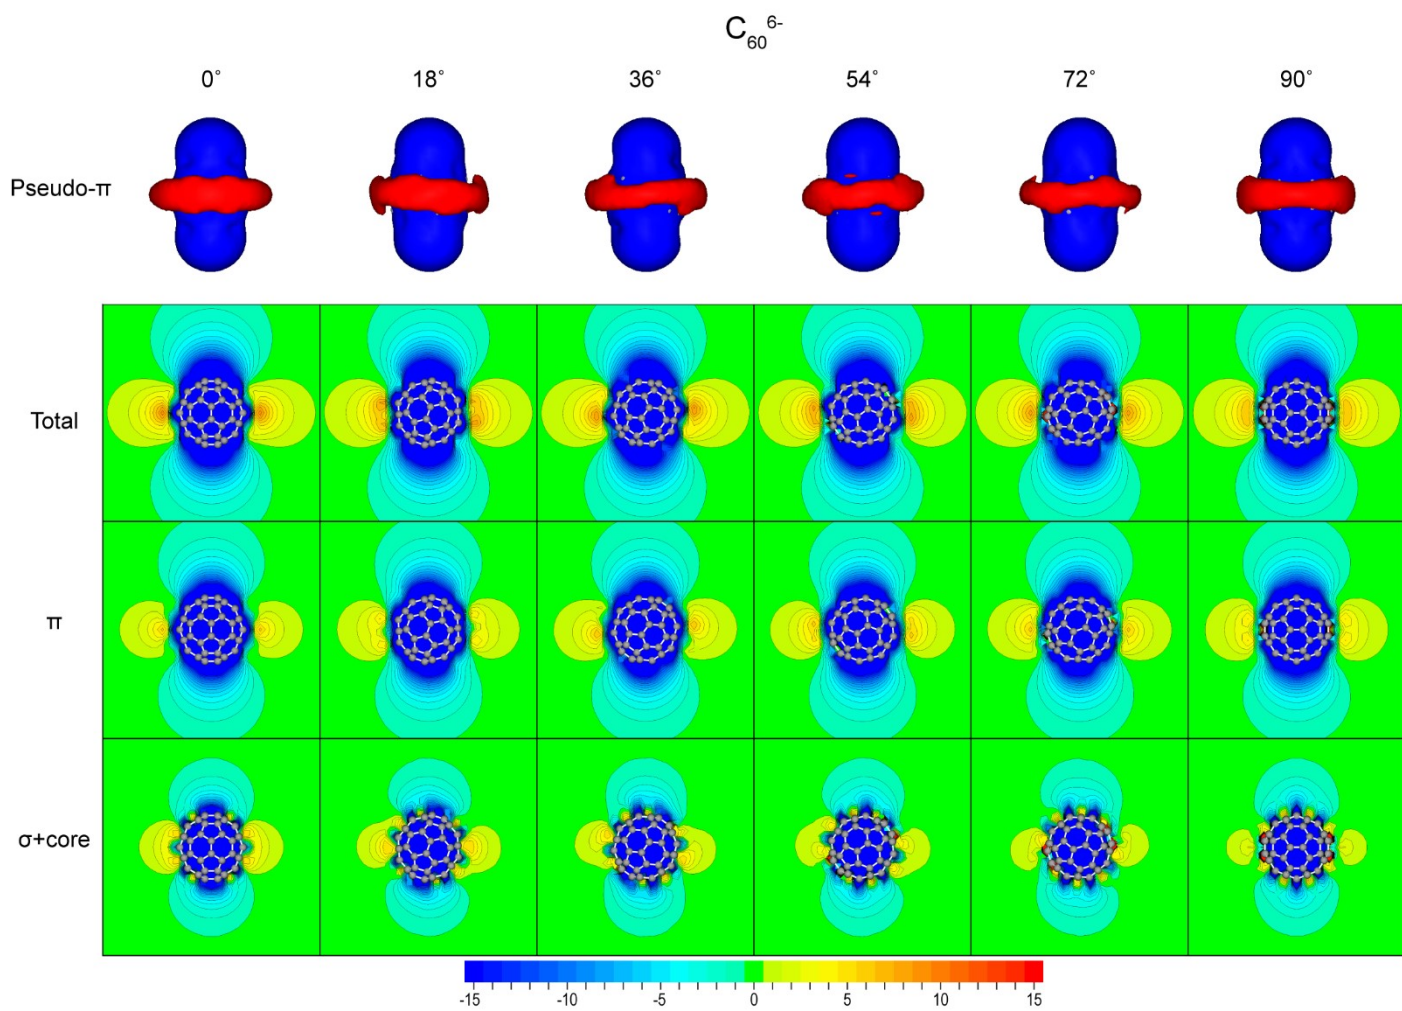

**Figure S8.** Contour maps of total and  $\pi$ ,  $\sigma$ +core contributions to the z component of the induced magnetic field,  $B_z^{ind}$ , and 3D isosurfaces (5ppm) of pseudo- $\pi$  contributions, of  $C_{60}^{6-}$  at tilt angles of 0°, 18°, 36°, 54°, 72° and 90°.

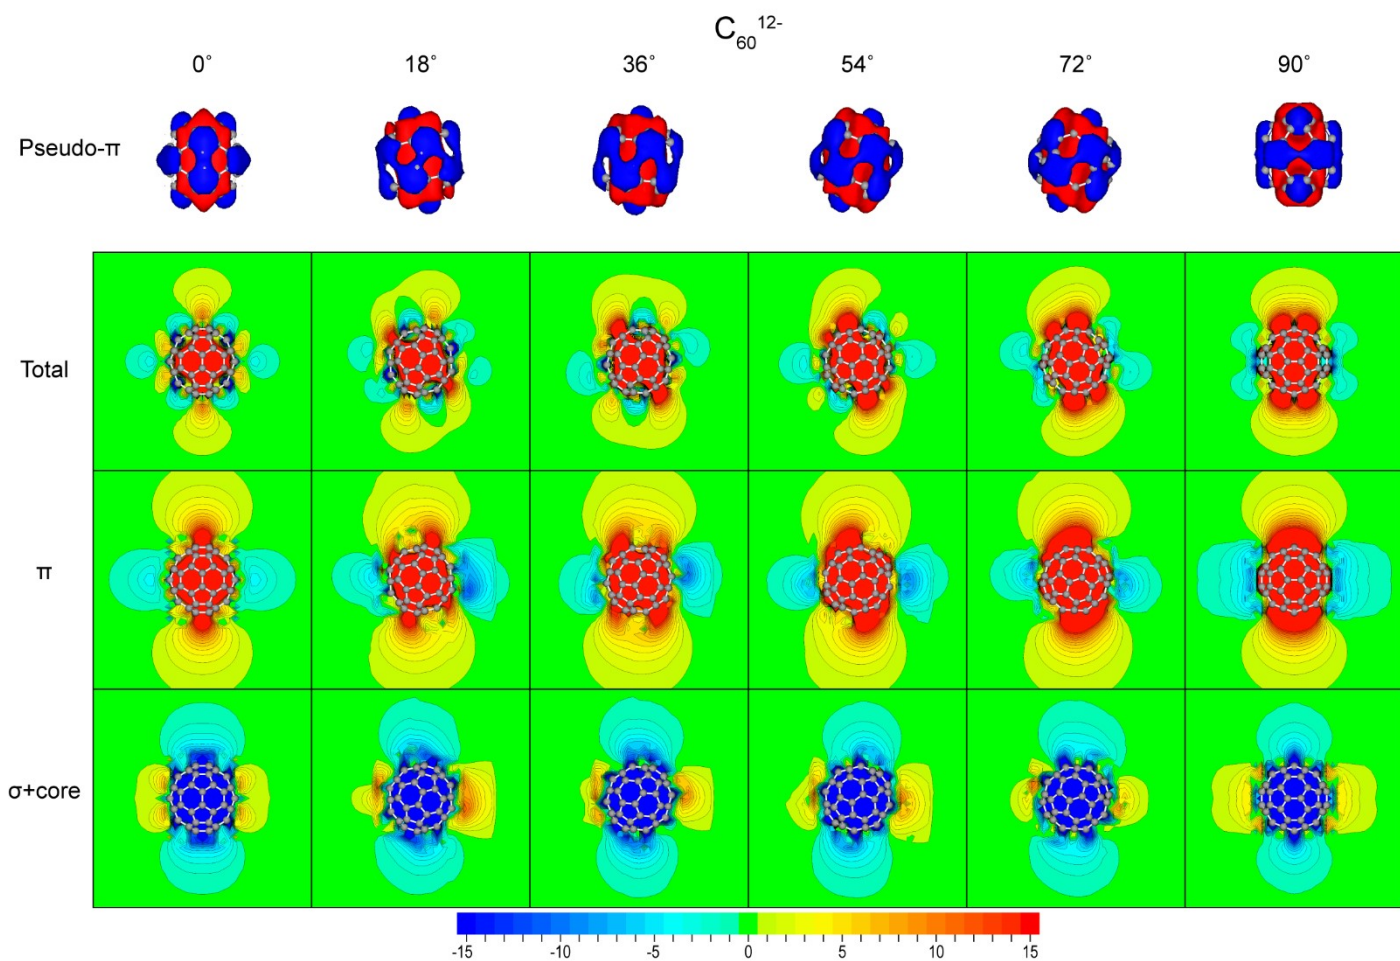

**Figure S9.** Contour maps of total and  $\pi$ ,  $\sigma$ +core contributions to the z component of the induced magnetic field,  $B_z^{ind}$ , and 3D isosurfaces (5ppm) of pseudo- $\pi$  contributions, of  $C_{60}^{12-}$  at tilt angles of 0°, 18°, 36°, 54°, 72° and 90°.

**Table S1.** Central Nucleus-Independent Chemical Shift tensor for the studied species calculated at the PBE/TZ2P level, which remain under rotation, as given by their principal-axis-system (PAS) for the shielding tensor ( $\sigma$ ), denoting the average, the NICS(0) value  $\text{NICS}(0) = -1/3 * (\sigma_{11} + \sigma_{22} + \sigma_{33})$  and the anisotropic term  $\text{NICS}_{\text{aniso}} = -(\sigma_{33} - 1/2 * (\sigma_{11} + \sigma_{22}))$ . Values are given in ppm.

|                                | PAS components |               |               | Average | NICS(0) | NICS <sub>Aniso</sub> |
|--------------------------------|----------------|---------------|---------------|---------|---------|-----------------------|
|                                | $\sigma_{11}$  | $\sigma_{22}$ | $\sigma_{33}$ |         |         |                       |
| [10]CPP                        | -1.6           | 3.1           | 3.1           | 1.6     | -1.6    | -2.4                  |
| [10]CPP <sup>2+</sup>          | 2.7            | 2.7           | 25.9          | 10.4    | -10.4   | -23.2                 |
| [8]CPP                         | -2.7           | 4.7           | 4.7           | 2.2     | -2.2    | -3.7                  |
| [8]CPP <sup>2+</sup>           | 4.4            | 4.4           | 31.9          | 13.5    | -13.5   | -27.5                 |
| CNB                            | -11.6          | 11.5          | 11.5          | 3.8     | -3.8    | -11.5                 |
| CNB <sup>2+</sup>              | 7.0            | 7.0           | 35.3          | 16.4    | -16.4   | -28.3                 |
| C <sub>60</sub>                | 1.0            | 1.0           | 1.0           | 1.0     | -1.0    | 0.0                   |
| C <sub>60</sub> <sup>6-</sup>  | 51.8           | 51.8          | 51.8          | 51.8    | -51.8   | 0.0                   |
| C <sub>60</sub> <sup>12-</sup> | -35.8          | -35.8         | -35.8         | -35.8   | 35.8    | 0.0                   |
